# Supplementary material for: Prediction of response to anti-EGFR antibody-based therapies by multigene sequencing in colorectal cancer patients
Source: Springer Nature journal article supplement (doi:10.1186/s12885-015-1752-5), 2015-10-27
Supplement: MOESM1 [file 9745284]

ADDITIONAL MATERIAL

SUPPLEMENTARY FIGURES

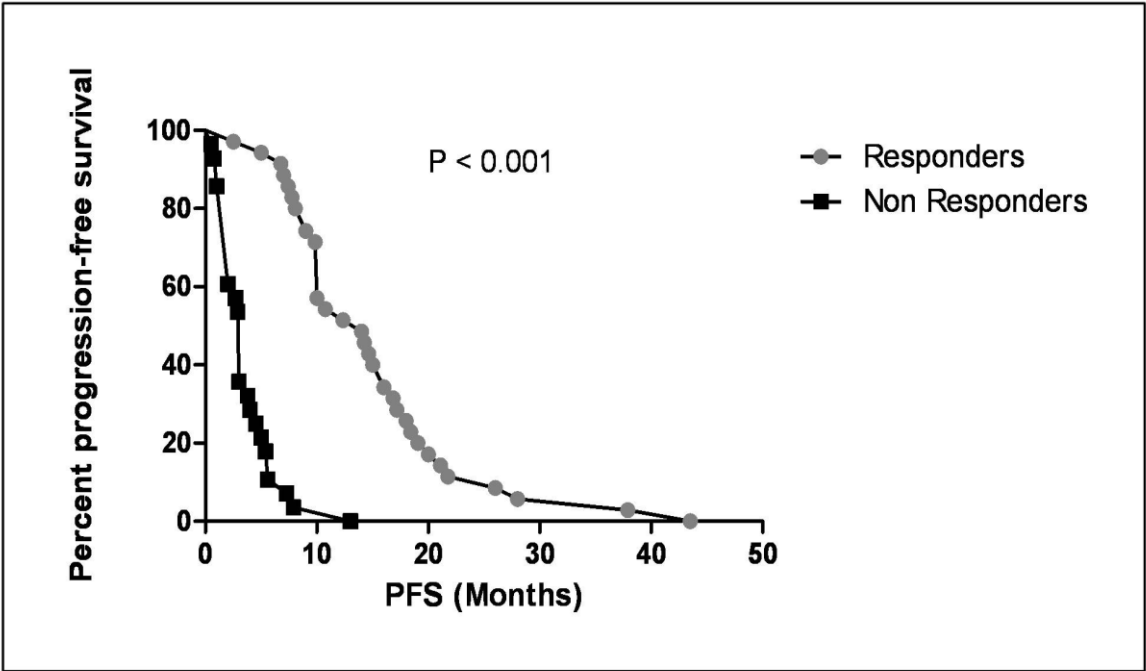

Figure S1. Kaplan Meier plots for progression-free survival (PFS) in the two cohorts (responders and non-responders) of CRC patients. The plots show a significantly different profile in responder versus non-responder patients.

|                | Sample | Genes             |      |      |        |       |       | Mutations / Sample |   |
|----------------|--------|-------------------|------|------|--------|-------|-------|--------------------|---|
|                |        | KRAS <sup>1</sup> | NRAS | BRAF | PIK3CA | FBXW7 | SMAD4 |                    |   |
| Responders     | CR     | D_5427            |      |      |        |       |       | 0                  |   |
|                | CR     | D_5442            |      |      |        |       |       | 0                  |   |
|                | CR     | D_5058            |      |      |        |       |       | 0                  |   |
|                | CR     | D_5033            |      |      |        |       |       | 0                  |   |
|                | CR     | D_5038            |      |      |        |       |       | 0                  |   |
|                | CR     | D_5031            |      |      |        |       |       | 0                  |   |
|                | CR     | D_5032            |      |      |        |       |       | 0                  |   |
|                | PR     | D_5449            |      |      |        |       |       |                    | 1 |
|                |        | D_5426            |      |      |        |       |       |                    | 0 |
|                |        | D_5432            |      |      |        |       |       |                    | 0 |
|                |        | D_5434            |      |      |        |       |       |                    | 0 |
|                |        | D_5444            |      |      |        |       |       |                    | 2 |
|                |        | D_5050            |      |      |        |       |       |                    | 0 |
|                |        | D_5048            |      |      |        |       |       |                    | 0 |
|                |        | D_5056            |      |      |        |       |       |                    | 0 |
|                |        | D_5272            |      |      |        |       |       |                    | 0 |
|                |        | D_5071            |      |      |        |       |       |                    | 0 |
|                |        | D_5039            |      |      |        |       |       |                    | 0 |
|                |        | D_5065            |      |      |        |       |       |                    | 0 |
|                |        | D_5066            |      |      |        |       |       |                    | 0 |
|                |        | D_5041            |      |      |        |       |       |                    | 0 |
|                |        | D_5040            |      |      |        |       |       |                    | 0 |
|                | D_5450 |                   |      |      |        |       |       | 0                  |   |
|                | D_5438 |                   |      |      |        |       |       | 0                  |   |
|                | D_5453 |                   |      |      |        |       |       | 1                  |   |
|                | D_5064 |                   |      |      |        |       |       | 1                  |   |
|                | D_5063 |                   |      |      |        |       |       | 0                  |   |
|                | D_5448 |                   |      |      |        |       |       | 0                  |   |
|                | D_5409 |                   |      |      |        |       |       | 0                  |   |
|                | D_5428 |                   |      |      |        |       |       | 1                  |   |
| D_5429         |        |                   |      |      |        |       | 2     |                    |   |
| D_5451         |        |                   |      |      |        |       | 0     |                    |   |
| D_5435         |        |                   |      |      |        |       | 0     |                    |   |
| D_5445         |        |                   |      |      |        |       | 0     |                    |   |
| D_5452         |        |                   |      |      |        |       | 0     |                    |   |
| D_5447         |        |                   |      |      |        |       | 0     |                    |   |
| D_5408         |        |                   |      |      |        |       | 1     |                    |   |
| Non Responders | PD     | D_5070            |      |      |        |       |       | 0                  |   |
|                |        | D_5060            |      |      |        |       |       | 1                  |   |
|                |        | D_5061            |      |      |        |       |       | 2                  |   |
|                |        | D_5053            |      |      |        |       |       | 0                  |   |
|                |        | D_5034            |      |      |        |       |       | 0                  |   |
|                |        | D_5082            |      |      |        |       |       | 1                  |   |
|                |        | D_5051            |      |      |        |       |       | 0                  |   |
|                |        | D_5074            |      |      |        |       |       | 1                  |   |
|                |        | D_5035            |      |      |        |       |       | 2                  |   |
|                |        | D_5043            |      |      |        |       |       | 1                  |   |
|                |        | D_5052            |      |      |        |       |       | 1                  |   |
|                |        | D_5068            |      |      |        |       |       | 0                  |   |
|                |        | D_5037            |      |      |        |       |       | 2                  |   |
|                |        | D_5044            |      |      |        |       |       | 0                  |   |
|                |        | D_5425            |      |      |        |       |       | 1                  |   |
|                |        | D_5431            |      |      |        |       |       | 1                  |   |
|                |        | D_5433            |      |      |        |       |       | 1                  |   |
|                |        | D_5436            |      |      |        |       |       | 0                  |   |
|                |        | D_5437            |      |      |        |       |       | 0                  |   |
|                |        | D_5439            |      |      |        |       |       | 1                  |   |
|                |        | D_5443            |      |      |        |       |       | 3                  |   |
|                |        | D_5454            |      |      |        |       |       | 1                  |   |
|                |        | D_5455            |      |      |        |       |       | 1                  |   |
| D_5407         |        |                   |      |      |        | 3     |       |                    |   |
| D_5430         |        |                   |      |      |        | 1     |       |                    |   |
| D_5440         |        |                   |      |      |        | 0     |       |                    |   |
| D_5446         |        |                   |      |      |        | 1     |       |                    |   |
| D_5441         |        |                   |      |      |        | 1     |       |                    |   |

  

|                             |     |    |     |     |     |     |
|-----------------------------|-----|----|-----|-----|-----|-----|
| Mutations in Responders     | 3   | 1  | 1   | 2   | 1   | 1   |
| Percent                     | 8%  | 3% | 3%  | 5%  | 3%  | 3%  |
| Mutations in Non Responders | 8   | 1  | 4   | 4   | 5   | 4   |
| Percent                     | 29% | 4% | 14% | 14% | 18% | 14% |
| Total Mutations             | 11  | 2  | 5   | 6   | 6   | 5   |
| Percent                     | 17% | 3% | 8%  | 9%  | 9%  | 8%  |

  

|                   |      |      |        |       |       |
|-------------------|------|------|--------|-------|-------|
| KRAS <sup>1</sup> | NRAS | BRAF | PIK3CA | FBXW7 | SMAD4 |
|-------------------|------|------|--------|-------|-------|

<sup>1</sup> = previously undetected mutations

CR = Complete remission

PR = Partial response

SD = Stable disease

PD = Progressive disease

**Figure S2. Frequencies of mutation in the six genes correlated with anti-EGFR moAb responsiveness.** The figure shows the mutations detected in genes (*NRAS*, *BRAF*, *PIK3CA*, *FBXW7*, *SMAD4* and previously undetected variations at *KRAS*,) that display imbalanced frequencies in responder versus non-responder patients.

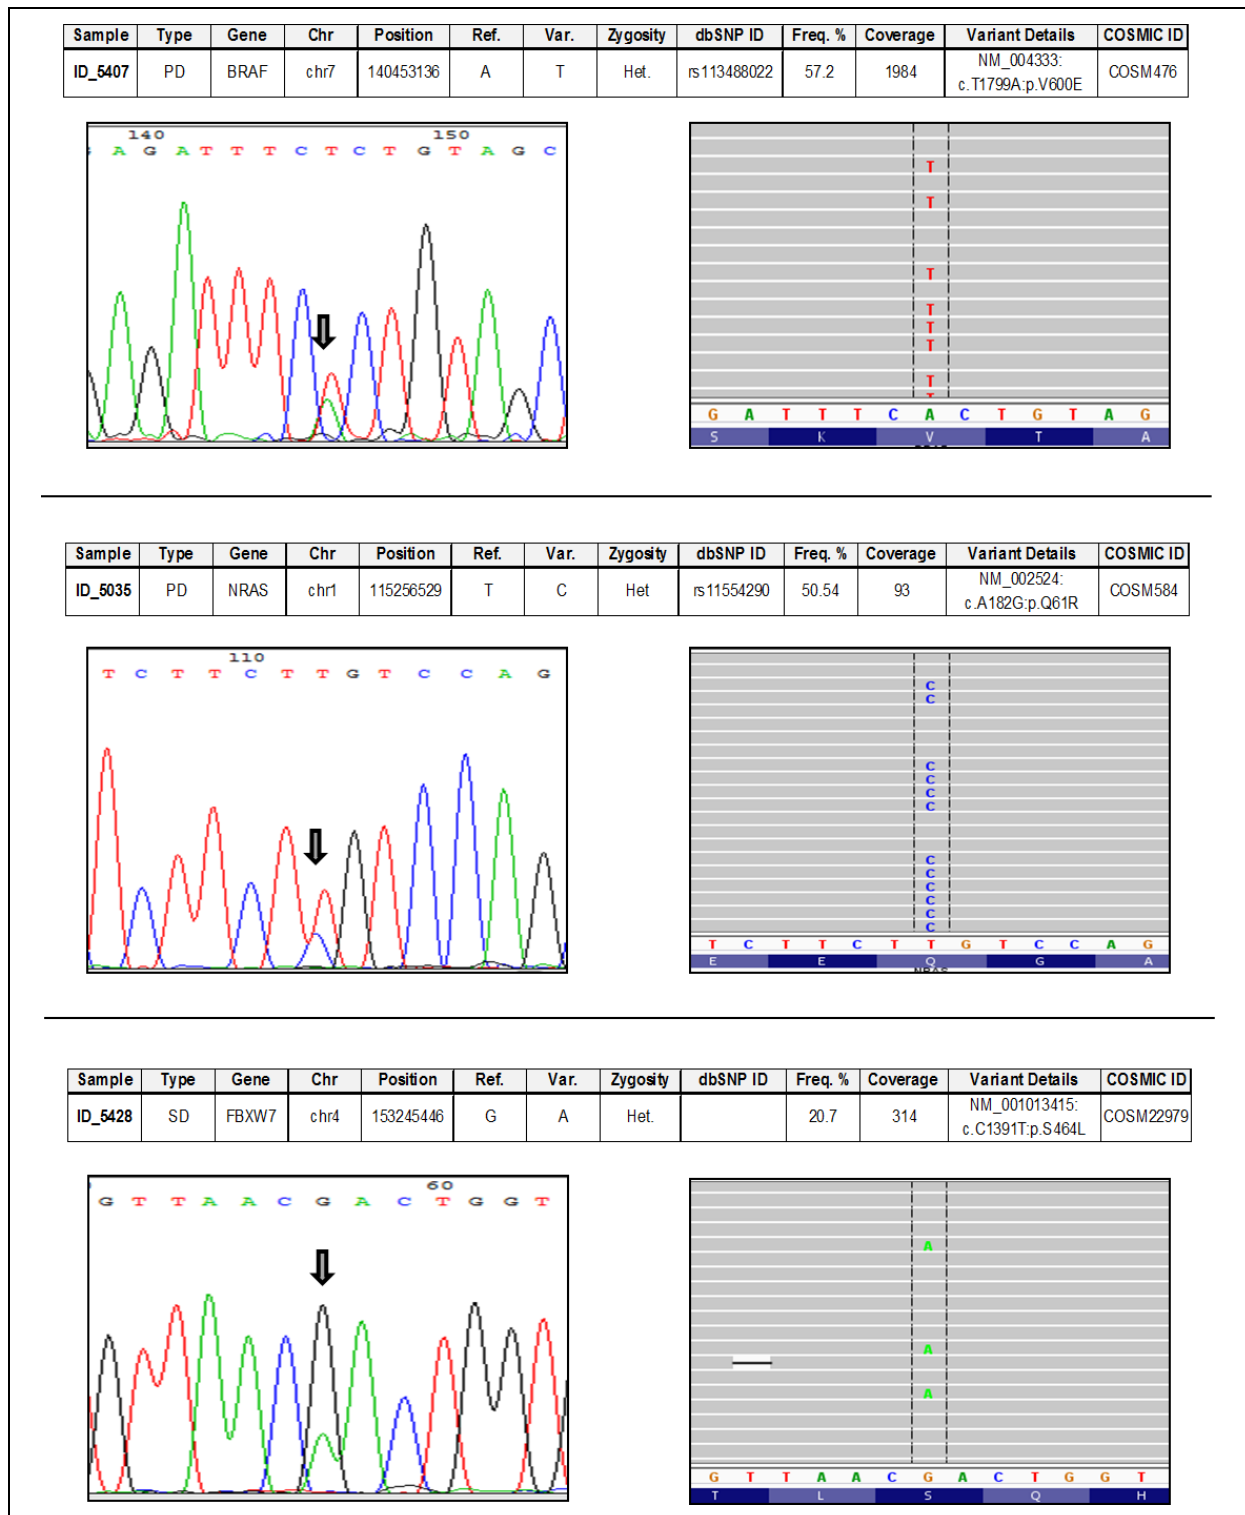

**Figure S3. Sanger sequencing validation of *BRAF*, *NRAS*, and *FBXW7* mutations.** All mutations found in *BRAF*, *NRAS*, and *FBXW7* were validated with Sanger sequencing. The figure shows one representative sample for each gene. On the left are displayed Sanger chromatograms, while results of NGS, showing read alignment to the reference genome, are on the right of the panel.
